# Supplementary material
Source: PubMed Central journal article supplement (PMC5313075)
Supplement: jciinsight-2-89303-s001.pdf [file jciinsight-2-89303-s001.pdf]

| Patient # | A                     | B                     |
|-----------|-----------------------|-----------------------|
| 61        | 0.372 ( $\pm 0.105$ ) | 0.139 ( $\pm 0.119$ ) |
| 62        | 0.259 ( $\pm 0.219$ ) | 0.135 ( $\pm 0.093$ ) |
| 63        | 0.494 ( $\pm 0.397$ ) | 0.090 ( $\pm 0.039$ ) |
| 64        | 0.127 ( $\pm 0.119$ ) | 0.040 ( $\pm 0.024$ ) |
| 65        | 0.206 ( $\pm 0.202$ ) | 0.094 ( $\pm 0.076$ ) |
| 66        | 0.159 ( $\pm 0.088$ ) | 0.078 ( $\pm 0.054$ ) |
| 67        | 0.219 ( $\pm 0.142$ ) | 0.116 ( $\pm 0.111$ ) |
| 68        | 0.247 ( $\pm 0.166$ ) | 0.105 ( $\pm 0.086$ ) |
| 70        | 0.204 ( $\pm 0.122$ ) | 0.077 ( $\pm 0.042$ ) |
| Mean      | 0.254                 | 0.097 <sup>#</sup>    |

**Supplemental Table**
